# Supplementary material for: The synergetic effect of N, S-codoped carbon and CoOx nanodots derived from ZIF-67 as a highly efficient cocatalyst over CdS nanorods
Source: Royal Society of Chemistry journal article supplement (doi:10.1039/c9se01228a), 2020-01-01
Supplement: c9se01228a1.pdf [file c9se01228a1.pdf]

# Synergetic effect of N, S-codoped carbon and CoO<sub>x</sub> nanodots derived from ZIF-67 as highly efficient cocatalyst over CdS nanorods

Junmei Wang,<sup>ab#</sup> Qinchao Xu,<sup>c#</sup> Manli Liu,<sup>b</sup> Kefeng Wang,<sup>a</sup> Zhijian Wang<sup>\*cd</sup>, Peng Qu<sup>\*a</sup>

<sup>a</sup> Henan engineering center of new energy battery materials, College of Chemistry and Chemical Engineering, Shangqiu Normal University, Shangqiu 476000, China

<sup>b</sup> College of Chemistry and Molecular Engineering, Zhengzhou University, Zhengzhou 450001, China

<sup>c</sup> State Key Laboratory of Coal Conversion, Institute of Coal Chemistry, Chinese Academy of Sciences, Taiyuan, 030001, P. R. China

<sup>d</sup> State Key Laboratory of Photocatalysis on Energy and Environment, Fuzhou University, Fuzhou, 350116, P. R. China.

Corresponding author. *E-mail*: wangzhijian@sxicc.ac.cn, qupeng0212@163.com

# The two authors contribute the same.

**Table S1. Elemental compositions of C, S, N, O and Co elements in the CoO<sub>x</sub>@N, S-C**

| Element                | C    | S    | N    | O   | Co  |
|------------------------|------|------|------|-----|-----|
| Atomic Concentration % | 43.0 | 14.7 | 25.6 | 6.8 | 9.9 |

**Table S.2 Biexponential decay parameters for emission decay of CdS and CoO<sub>x</sub>@N, S-C/CdS**

| Samples                      | a1    | τ1(ns) | a2     | τ2(ns) | <τ>(ns) |
|------------------------------|-------|--------|--------|--------|---------|
| CdS                          | 0.056 | 0.519  | 0.0027 | 7.827  | 3.6089  |
| CoO <sub>x</sub> @N, S-C/CdS | 0.066 | 0.443  | 0.0015 | 5.545  | 1.5753  |

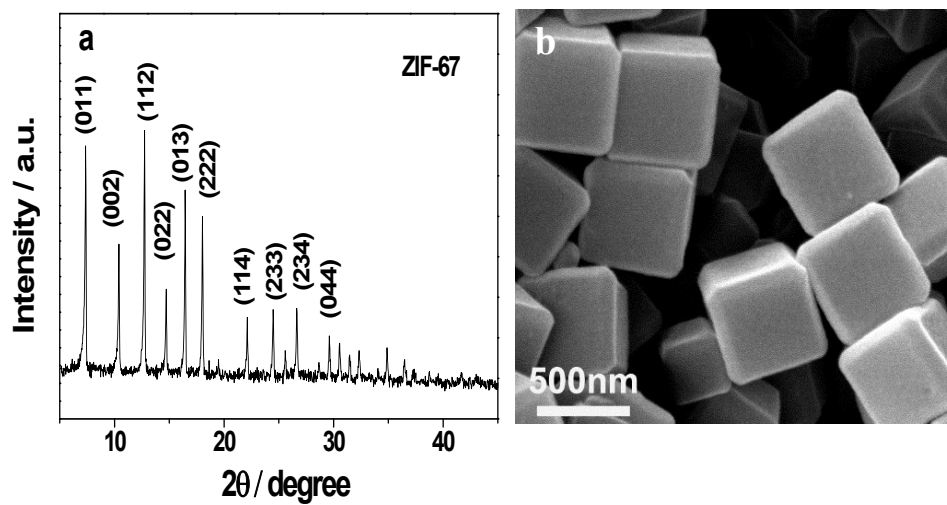

Fig. S1 XRD patterns and SEM images of as-prepared ZIF-67

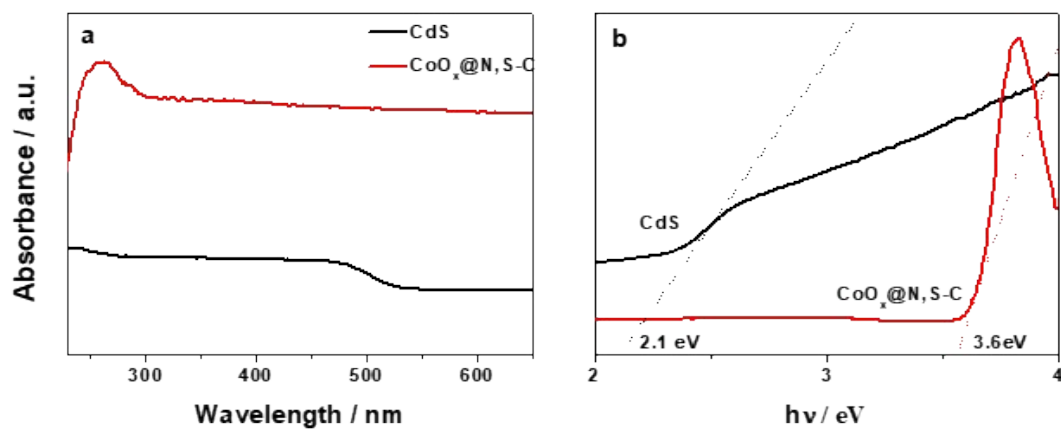

Fig. S2 UV-Vis spectra (a) and corresponding Tauc plots (b) of CoO<sub>x</sub>@N, S-C and CdS

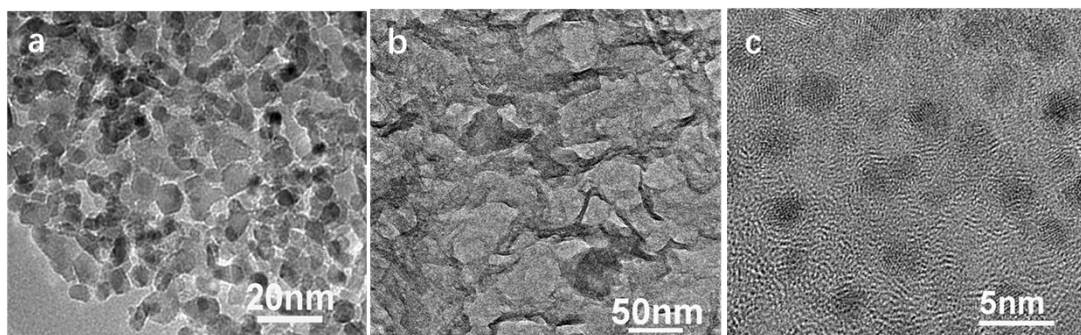

**Fig. S3** TEM images of (a)  $\text{CoO}_x$ , (b) N, S-C and (c)  $\text{CoO}_x@\text{N}$ , S-C

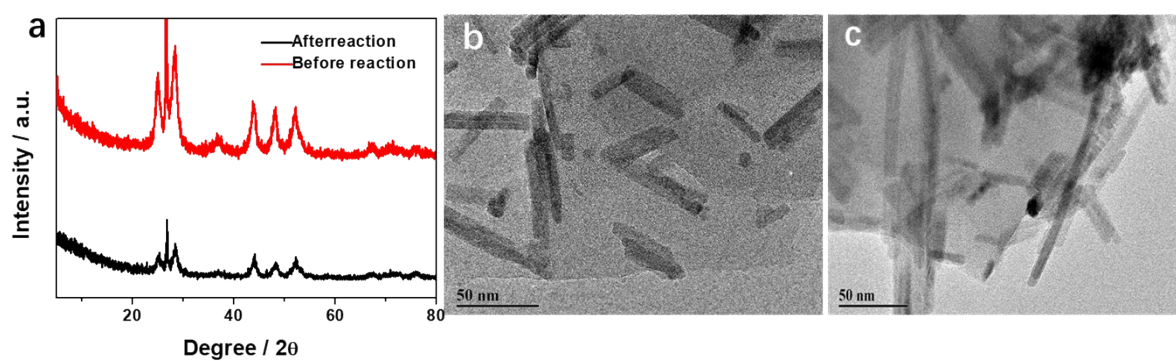

**Fig. S4** Comparison of (a) XRD patterns and (b, c) TEM images of  $\text{CoO}_x@\text{N}$ , S-C/CdS photocatalyst before and after photocatalytic experiment reaction

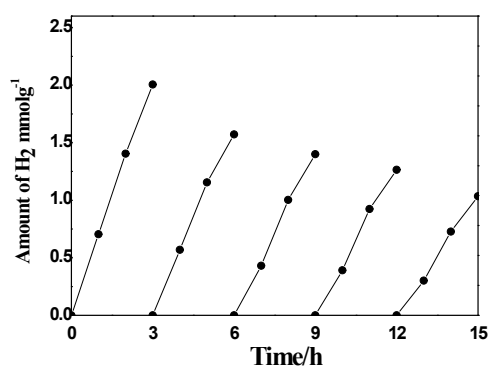

**Fig. S5** Cycle test on pure CdS suspended in 50 mL water containing lactic acid (10 % V/V) aqueous solution bubbled with Ar per 3h under irradiation of visible light
